# Supplementary material
Source: publisher site journal article supplement (https://www.dovepress.com/article/371709)
Supplement: Supplementary file 1 [file get_supplementary_file.php]

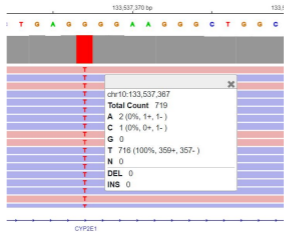

rs8192777

G>T

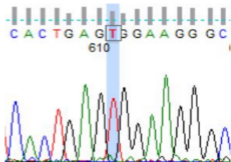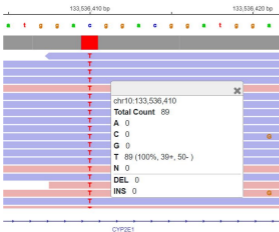

rs12761234

C>T

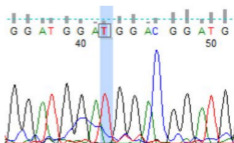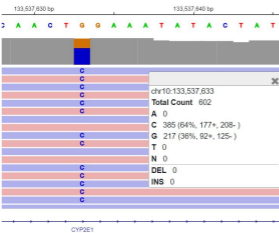

rs2070676

C>C/G

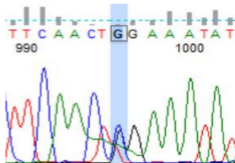

A

B

Supplementary Figure 1.

Visual representation of the *CYP2E1* gene in the Integrative Genomics Viewer (IGV) software and chromatograms of the detected single nucleotide polymorphism (SNP). (A) IGV screenshot representing sequencing reads obtained by Next- generation Sequencing (NGS) mapping to the *CYP2E1* gene and the detected SNPs. Reads are colored according to the aligned strand (red = forward strand; blue = reverse strand). The reference nucleotide sequence is provided above the sequencing reads. (B) Representation of the confirmatory chromatogram of selected *CYP2E1* genetic variants obtained by Sanger sequencing.

Supplementary Table 1.

Single nucleotide variant identification using reference SNP (rs) reports accumulated in dbSNP database (<https://www.ncbi.nlm.nih.gov/snp/>)

| Molecular consequence     | SNV ID      |
|---------------------------|-------------|
| Exonic synonymous variant | rs2515641   |
| Intronic variants         | rs943975    |
|                           | rs1536828   |
|                           | rs8192769   |
|                           | rs8192770   |
|                           | rs915906    |
|                           | rs8192772   |
|                           | rs2070675   |
|                           | rs915907    |
|                           | rs915908    |
|                           | rs943976    |
|                           | rs8192775   |
|                           | rs188765034 |
|                           | rs7092584   |
|                           | rs6413432*  |
|                           | rs2864987   |
|                           | rs2864986   |
|                           | rs2864985   |
|                           | rs2011661   |
|                           | rs2864984   |
|                           | rs743535    |
|                           | rs1410897   |
|                           | rs1329149   |
|                           | rs12761234  |
|                           | rs28517390  |
|                           | rs8192777   |

|                 |               |
|-----------------|---------------|
|                 | rs2070676*    |
|                 | rs2070677     |
|                 | rs2515642     |
|                 | rs2480259     |
|                 | rs2480258     |
|                 | rs2249694**   |
|                 | rs2249695     |
|                 | rs903356314   |
|                 | rs61868336    |
|                 | rs71505853    |
|                 | rs12762259    |
|                 | rs372337680   |
|                 | rs72862138    |
|                 | rs41299414    |
|                 | rs8192776     |
|                 | rs743534      |
|                 | rs28371747    |
|                 | rs15851399654 |
|                 | rs1589956451  |
|                 | rs78660337    |
|                 | rs41283307    |
| 3' UTR variants | rs2480256     |
|                 | rs2480257     |
|                 | rs7081484     |
| Upstream        | rs2031922     |
|                 | rs2070673*    |
| Intergenic      | rs41299398    |
|                 | rs3813866     |
|                 | rs8192766     |
|                 | rs117944666   |
|                 | rs6413423     |

\* rs6413432 referred to CYP2E1\*6 (T>A) allelic variant; rs2070676 referred to CY2E1\*1B (G>A/C/T) allelic variant; rs2070673 referred to CYP2E1\*7A (A>T) allelic variant. \*\*rs2249694 was found in the Obesity-related traits (GWAS-Dis). Source: National Library of Medicine.
